# Supplementary material for: Ovarian cancer population screening and mortality after long-term follow-up in the UK Collaborative Trial of Ovarian Cancer Screening (UKCTOCS): a randomised controlled trial
Source: PubMed Central journal article supplement (PMC8192829; doi:10.1016/s0140-6736(21)00731-5), 2021-06-05
Supplement: mmc1.pdf [file mmc1.pdf]

# THE LANCET

## Supplementary appendix

This appendix formed part of the original submission and has been peer reviewed. We post it as supplied by the authors.

Supplement to: Menon U, Gentry-Maharaj A, Burnell M, et al. Ovarian cancer population screening and mortality after long-term follow-up in the UK Collaborative Trial of Ovarian Cancer Screening (UKCTOCS): a randomised controlled trial. *Lancet* 2021; published online May 12. [http://dx.doi.org/10.1016/S0140-6736\(21\)00731-5](http://dx.doi.org/10.1016/S0140-6736(21)00731-5).

# Appendix: Supplementary Material

---

## Contents

|                                                                                                                                                                                                                                                                            |    |
|----------------------------------------------------------------------------------------------------------------------------------------------------------------------------------------------------------------------------------------------------------------------------|----|
| A. Further details of statistical analysis .....                                                                                                                                                                                                                           | 3  |
| B. Supplementary Tables.....                                                                                                                                                                                                                                               | 4  |
| Web Table 1: Source of notification of cancer and deaths of women whose notes were submitted for Outcome Review.....                                                                                                                                                       | 4  |
| Web Table 2: Diagnosis assigned by Outcome Review Committee for women with pre-specified ICD-10 codes.....                                                                                                                                                                 | 5  |
| Web Table 3: Detailed morphology and FIGO 2014 stage of ovarian and tubal cancers ...                                                                                                                                                                                      | 6  |
| Web Table 4: Ovarian and tubal cancer incidence and deaths by group and year of analysis.....                                                                                                                                                                              | 7  |
| Web Table 5: Sensitivity analysis for primary analysis .....                                                                                                                                                                                                               | 8  |
| Web Table 6: Royston-Parmer model based estimates of the effect of screening at the pre-specified time-points of 5, 10, 15 and 18 years since randomisation .....                                                                                                          | 10 |
| C. Supplementary Figures .....                                                                                                                                                                                                                                             | 11 |
| Web Figure 1: Cumulative invasive epithelial ovarian and tubal cancer deaths .....                                                                                                                                                                                         | 11 |
| Web Figure 2a: Cumulative ovarian and tubal cancer deaths by randomisation group with RP model fit overlaid - MMS versus no screening .....                                                                                                                                | 12 |
| Web Figure 2b: Cumulative ovarian and tubal cancer deaths by randomisation group with RP model fit overlaid - USS versus no screening .....                                                                                                                                | 13 |
| Web Figure 3a: RP model estimate of ovarian and tubal cancer death rates (hazard function) with 95% confidence limits – MMS versus no screening.....                                                                                                                       | 14 |
| Web Figure 3b: RP model estimate of ovarian and tubal cancer death rates (hazard function) with 95% confidence limits – USS versus no screening.....                                                                                                                       | 15 |
| Web Figure 4a: RP model estimate of ovarian and tubal cancer death hazard ratio for MMS versus no screening with 95% confidence limits .....                                                                                                                               | 16 |
| Web Figure 4b: RP model estimate of ovarian and tubal cancer death hazard ratio for USS versus no screening with 95% confidence limits .....                                                                                                                               | 17 |
| Web Figure 5: Survival rates in women with ovarian and tubal cancer in the no screening group compared with one-, and five- year age and period adjusted survival rates in the UK population. 10 year survival rates by age group not available for the UK population..... | 18 |
| Web Figure 6a: Cumulative incidence rates (hazard functions) of ovarian and tubal cancer with 95% confidence bands MMS versus no screening.....                                                                                                                            | 19 |
| Web Figure 6b: Cumulative incidence rates (hazard functions) of ovarian and tubal cancer with 95% confidence bands USS versus no screening.....                                                                                                                            | 20 |
| D. Long term follow up of UKCTOCS committees and teams.....                                                                                                                                                                                                                | 21 |

## A. Further details of statistical analysis

We chose the Versatile test described in 2016<sup>1</sup> which is a combination test of 3 log-rank test statistics ( $Z_1, Z_2, Z_3$ ), each weighted differentially. The first is unweighted and so is the standard log-rank test, whilst the latter two are separately weighted according to either the overall survival or failure function, and hence sensitive to early and late effects, respectively. The test does not anticipate a particular functional form for the hazard ratio, but allows for any non-proportional treatment effect (whether early or late) to be more likely identified than a standard log-rank test would, whilst still maintaining good power under proportional hazards. The test statistic  $Z_m = \max\{|Z_1|, |Z_2|, |Z_3|\}$  was compared against a trivariate normal distribution with mean vector zero and a variance-covariance matrix based on the covariance estimates between the three test statistics. It is this correlation between tests that limits the effective degrees of freedom required to (considerably) less than 3, providing statistical efficiency whilst 'covering the bases' of possible outcomes.

We describe time-dependent features of the screening effect by estimating the hazard ratio and the absolute survival difference at the pre-specified time-points of  $t=5, 10, 15$  and 18 years (maximal follow-up was 19.3 years) using a flexible parametric RP model. The number of knots and subsequent spline functions were chosen based on the model with the lowest Akaike Information Criteria (AIC) when fitted to the MMS group, and then applied to the other groups. Knot placement was the default option, according to the centiles of the uncensored MMS group survival times.

The model was fitted using the Stata package `stpm2`.<sup>2</sup>

### References

1. Karrison TG. Versatile tests for comparing survival curves based on weighted log-rank statistics. *The Stata Journal* 2016; 16(3): 678-90.
2. Lambert PC RP. Further development of flexible parametric models for survival analysis. *The Stata Journal* 2009; 9(2): 265-90.

## B. Supplementary Tables

**Web Table 1: Source of notification of cancer and deaths of women whose notes were submitted for Outcome Review**

| Sources of cancer and death notification          | Date last update received |
|---------------------------------------------------|---------------------------|
| <b>Death Registration</b>                         |                           |
| England                                           | 18/09/2020                |
| Wales                                             | 18/09/2020                |
| Northern Ireland                                  | 14/09/2020                |
| <b>Cancer Registration</b>                        |                           |
| England                                           | 07/10/2020                |
| Wales*                                            | 31/12/2016                |
| Northern Ireland                                  | 23/03/2020                |
| <b>Hospital Episode Statistics</b>                |                           |
| England                                           | 05/06/2020                |
| Wales                                             | 14/07/2020                |
| <b>Registry Flagging (Members &amp; Posting)</b>  |                           |
| England                                           | 18/09/2020                |
| Wales                                             | 18/09/2020                |
| <b>National Disease Registration Service</b>      |                           |
| England                                           | 13/02/2015                |
| <b>UKCTOCS Health Questionnaires</b>              |                           |
| FUQ1                                              | 2005-2010                 |
| FUQ2                                              | 04/04/2014                |
| FUQ3**                                            | 16/06/2020                |
| <b>Ad-hoc Communication</b>                       |                           |
| Trial participants, their families and physicians | Throughout the trial      |

FUQ=Follow-up questionnaire. \*NHS Digital was not able to distribute Welsh cancer registration data following implementation of GDPR. \*\*Sent to subset of participant who had exited registry flagging or required confirmation of bilateral oophorectomy

**Web Table 2: Diagnosis assigned by Outcome Review Committee for women with pre-specified ICD-10 codes**

| Diagnosis assigned by Outcome Review Committee                                   | All arms | No screening | MMS  | USS  |
|----------------------------------------------------------------------------------|----------|--------------|------|------|
| Total*                                                                           | 4482     | 2183         | 1170 | 1129 |
| Ovarian or tubal cancer                                                          | 2055     | 1016         | 522  | 517  |
| Malignant neoplasm without specification of site                                 | 252      | 124          | 69   | 59   |
| Malignant neoplasm without specification of site but not ovarian or tubal cancer | 388      | 197          | 95   | 96   |
| Other primary cancer                                                             | 1591     | 766          | 439  | 386  |
| Not a cancer                                                                     | 196      | 80           | 45   | 71   |

MMS=multimodal screening. USS=ultrasound screening. \*women for whom notification was received of 19 pre-specified ICD-10 codes

**Web Table 3: Detailed morphology and FIGO 2014 stage of ovarian and tubal cancers**

| Characteristics                                                                                                                                                                | MMS        | USS        | No screening | Total       |
|--------------------------------------------------------------------------------------------------------------------------------------------------------------------------------|------------|------------|--------------|-------------|
| <b>Morphology</b>                                                                                                                                                              |            |            |              |             |
| <b>Ovarian and tubal cancers</b>                                                                                                                                               | <b>522</b> | <b>517</b> | <b>1016*</b> | <b>2055</b> |
| <b>Invasive epithelial ovarian and tubal cancers</b>                                                                                                                           | <b>452</b> | <b>445</b> | <b>905</b>   | <b>1802</b> |
| Type I invasive epithelial cancer                                                                                                                                              | 64         | 45         | 115          | 224         |
| Low grade serous                                                                                                                                                               | 16         | 12         | 21           | 49          |
| Low grade carcinoma                                                                                                                                                            | 0          | 0          | 3            | 3           |
| Mucinous                                                                                                                                                                       | 8          | 11         | 33           | 52          |
| Low grade endometrioid                                                                                                                                                         | 20         | 8          | 31           | 59          |
| Clear Cell                                                                                                                                                                     | 19         | 14         | 25           | 58          |
| Brenner                                                                                                                                                                        | 0          | 0          | 1            | 1           |
| Mixed Cell                                                                                                                                                                     | 0          | 0          | 1            | 1           |
| Small Cell                                                                                                                                                                     | 1          | 0          | 0            | 1           |
| Type II invasive epithelial cancer                                                                                                                                             | 358        | 366        | 692          | 1416        |
| High grade serous                                                                                                                                                              | 300        | 309        | 586          | 1195        |
| High grade carcinoma                                                                                                                                                           | 27         | 32         | 50           | 109         |
| High grade endometrioid                                                                                                                                                        | 19         | 9          | 17           | 45          |
| Carcinosarcoma                                                                                                                                                                 | 12         | 16         | 39           | 67          |
| Type uncertain (grade unknown)                                                                                                                                                 | 30         | 34         | 98           | 162         |
| Serous                                                                                                                                                                         | 8          | 7          | 17           | 32          |
| Carcinoma                                                                                                                                                                      | 22         | 27         | 79           | 128         |
| Endometrioid                                                                                                                                                                   | 0          | 0          | 2            | 2           |
| <b>Borderline epithelial ovarian cancer</b>                                                                                                                                    | <b>54</b>  | <b>59</b>  | <b>91</b>    | <b>204</b>  |
| Serous                                                                                                                                                                         | 32         | 42         | 43           | 117         |
| Mucinous                                                                                                                                                                       | 17         | 12         | 41           | 70          |
| Endometrioid                                                                                                                                                                   | 2          | 1          | 1            | 4           |
| Brenner                                                                                                                                                                        | 0          | 0          | 4            | 4           |
| Mixed Cell                                                                                                                                                                     | 3          | 4          | 2            | 9           |
| <b>Non-epithelial ovarian cancer</b>                                                                                                                                           | <b>538</b> | <b>530</b> | <b>17</b>    | <b>1085</b> |
| Sarcoma                                                                                                                                                                        | 1          | 2          | 0            | 3           |
| Sex cord-stromal                                                                                                                                                               | 13         | 8          | 14           | 35          |
| Teratoma related                                                                                                                                                               | 2          | 3          | 3            | 8           |
| <b>Stage</b>                                                                                                                                                                   |            |            |              |             |
| <b>Invasive epithelial ovarian and tubal cancer</b>                                                                                                                            | <b>452</b> | <b>445</b> | <b>905</b>   | <b>1802</b> |
| I                                                                                                                                                                              | 91         | 55         | 116          | 262         |
| Ia                                                                                                                                                                             | 35         | 20         | 43           | 98          |
| Ib                                                                                                                                                                             | 4          | 1          | 2            | 7           |
| Ic                                                                                                                                                                             | 52         | 34         | 71           | 157         |
| II                                                                                                                                                                             | 41         | 35         | 69           | 145         |
| IIa                                                                                                                                                                            | 18         | 22         | 27           | 67          |
| IIb                                                                                                                                                                            | 23         | 13         | 42           | 78          |
| III                                                                                                                                                                            | 237        | 249        | 501          | 987         |
| IIIa                                                                                                                                                                           | 16         | 16         | 25           | 57          |
| IIIb                                                                                                                                                                           | 45         | 33         | 55           | 133         |
| IIIc                                                                                                                                                                           | 176        | 200        | 421          | 797         |
| IV                                                                                                                                                                             | 78         | 104        | 208          | 390         |
| IVa                                                                                                                                                                            | 22         | 33         | 75           | 130         |
| IVb                                                                                                                                                                            | 56         | 71         | 133          | 260         |
| Unable to stage                                                                                                                                                                | 5          | 2          | 11           | 18          |
| <b>Borderline epithelial ovarian cancer</b>                                                                                                                                    | <b>54</b>  | <b>59</b>  | <b>91</b>    | <b>204</b>  |
| I                                                                                                                                                                              | 50         | 55         | 79           | 184         |
| II                                                                                                                                                                             | 0          | 1          | 3            | 4           |
| III                                                                                                                                                                            | 4          | 3          | 9            | 16          |
| <b>Non-epithelial ovarian cancer</b>                                                                                                                                           | <b>16</b>  | <b>13</b>  | <b>17</b>    | <b>46</b>   |
| I                                                                                                                                                                              | 14         | 11         | 16           | 41          |
| II                                                                                                                                                                             | 1          | 0          | 1            | 2           |
| III                                                                                                                                                                            | 1          | 1          | 0            | 2           |
| IV                                                                                                                                                                             | 0          | 1          | 0            | 1           |
| Data are numbers. MMS=multimodal screening. USS=ultrasound screening. *Includes 1 case where histology not available and 2 cases of neoplasm of uncertain or unknown behaviour |            |            |              |             |

**Web Table 4: Ovarian and tubal cancer incidence and deaths by group and year of analysis**

| Time from randomisation | Ovarian and tubal cancer deaths |            |            |             | Ovarian and tubal cancer cases |            |            |             |
|-------------------------|---------------------------------|------------|------------|-------------|--------------------------------|------------|------------|-------------|
|                         | no screening                    | MMS        | USS        | overall     | no screening                   | MMS        | USS        | overall     |
| 0 ≤ years <1            | 4                               | 2          | 4          | 10          | 47                             | 46         | 56         | 149         |
| 1 ≤ years <2            | 14                              | 8          | 6          | 28          | 52                             | 36         | 37         | 125         |
| 2 ≤ years <3            | 19                              | 13         | 8          | 40          | 62                             | 41         | 25         | 128         |
| 3 ≤ years <4            | 28                              | 10         | 14         | 52          | 60                             | 22         | 26         | 108         |
| 4 ≤ years <5            | 28                              | 16         | 17         | 61          | 59                             | 31         | 32         | 122         |
| 5 ≤ years <6            | 43                              | 15         | 13         | 71          | 67                             | 27         | 27         | 121         |
| 6 ≤ years <7            | 26                              | 16         | 15         | 57          | 66                             | 36         | 38         | 140         |
| 7 ≤ years <8            | 40                              | 15         | 23         | 78          | 69                             | 34         | 28         | 131         |
| 8 ≤ years <9            | 45                              | 23         | 24         | 92          | 60                             | 39         | 25         | 124         |
| 9 ≤ years <10           | 55                              | 27         | 24         | 106         | 69                             | 28         | 24         | 121         |
| 10 ≤ years <11          | 45                              | 16         | 18         | 79          | 62                             | 26         | 23         | 111         |
| 11 ≤ years <12          | 47                              | 17         | 12         | 76          | 67                             | 34         | 35         | 136         |
| 12 ≤ years <13          | 44                              | 31         | 36         | 111         | 58                             | 41         | 32         | 131         |
| 13 ≤ years <14          | 42                              | 28         | 13         | 83          | 67                             | 27         | 39         | 133         |
| 14 ≤ years <15          | 47                              | 23         | 26         | 96          | 65                             | 17         | 28         | 110         |
| 15 ≤ years <16          | 50                              | 27         | 20         | 97          | 45                             | 22         | 21         | 88          |
| 16 ≤ years <17          | 27                              | 6          | 10         | 43          | 25                             | 10         | 13         | 48          |
| 17 ≤ years <18          | 13                              | 2          | 6          | 21          | 14                             | 5          | 7          | 26          |
| 18 ≤ years <19          | 2                               | 1          | 2          | 5           | 1                              | 0          | 1          | 2           |
| 19 ≤ years <20          | 0                               | 0          | 0          | 0           | 0                              | 0          | 0          | 0           |
| <b>Total</b>            | <b>619</b>                      | <b>296</b> | <b>291</b> | <b>1206</b> | <b>1015*</b>                   | <b>522</b> | <b>517</b> | <b>2054</b> |

MMS=multimodal screening. USS=ultrasound screening. \*In 1 additional case date of diagnosis was not available.



## Web Table 5: Sensitivity analysis for primary analysis

### Methods

Sensitivity analyses were undertaken for three particular issues 1) (non-)equivalence of data source 2) correlation of data within regional centres and 3) competing deaths.

1) Data-source: There was concern that there could be more comprehensive data in the MMS and USS groups than the no screening group, given the potential for more sources of information for these women. This analysis only considered data obtained or triggered from the receipt of electronic health records (eHR), where equivalence between groups could be guaranteed. This meant that not only data pertaining to OC death, but also any data pertaining to any reason for early censorship, from eHRs was used to create the necessary failure-event and time variables employed by the software. The primary analysis utilizing the Versatile test was repeated on data created according to the described criteria.

2) Correlation of data: Data may be correlated within centres. This could be due to systematic differences in delivery of the screen at the 13 centres or also due to regional socio-economic differences leading to variability in OC incidence and mortality outcome. The Versatile test cannot be modified to account for this. However, the standard Cox analysis on the primary outcome was a) fitted with the standard errors calculated using a 'cluster robust' sandwich estimator [Stata command `stcox` with model option `vce(cluster varname)`], and the effect on standard errors and significance was observed. In addition, b) a random effects flexible parametric model [Stata command `mestreg` or `stmixed`] was also be fitted to assess the effect a random intercept term for centre had on the mortality reduction estimate and standard error. Furthermore, this model allowed testing of the random effect variance, and hence the level of unexplained variability between centres.

3) Competing deaths: There is a possibility that the effect of 'competing risks' may impact on the primary outcome. These competing risk events may be death from another cause when the woman had ovarian or tubal cancer, or death from a related cancer (for example, endometrial or breast) that may not be reasonably considered as uninformative censoring. A competing risks model [Stata command `stcrreg`] incorporating the above events as competing risks was used to whether the Cox model primary outcome HR estimates were essentially no different to the sub-HRs from a competing risks model.

**Web Table 5**

|                                                       |              |         |         |         |         |
|-------------------------------------------------------|--------------|---------|---------|---------|---------|
| 1) Data source: eHR- equivalent only (Versatile test) |              |         |         |         |         |
|                                                       | max $\chi^2$ | p-value |         |         |         |
| MMS vs no screening                                   | 0.54         | 0.596   |         |         |         |
| USS vs no screening                                   | 1.18         | 0.374   |         |         |         |
| 2a) Regional Centres - cluster robust SEs             |              |         |         |         |         |
|                                                       | HR           | se      | L95% CI | U95% CI | p-value |
| MMS vs no screening                                   | 0.956        | 0.051   | 0.860   | 1.062   | 0.398   |
| USS vs no screening                                   | 0.938        | 0.069   | 0.812   | 1.083   | 0.380   |
| 2b) Regional Centres - mixed survival model*          |              |         |         |         |         |
|                                                       | HR           | se      | L95% CI | U95% CI | p-value |
| MMS vs no screening                                   | 0.956        | 0.068   | 0.832   | 1.098   | 0.524   |
| USS vs no screening                                   | 0.938        | 0.067   | 0.816   | 1.078   | 0.365   |
| 3) Competing risks - other deaths                     |              |         |         |         |         |
|                                                       | HR**         | se      | L95% CI | U95% CI | p-value |
| MMS vs no screening                                   | 0.955        | 0.067   | 0.832   | 1.097   | 0.515   |
| USS vs no screening                                   | 0.939        | 0.067   | 0.817   | 1.080   | 0.378   |

eHR=electronic health record. MMS=multimodal screening. USS=ultrasound screening. max  $\chi^2$  = maximum chi-squared values from the 3 weighted log-rank tests. HR=hazard ratio. SE/se=standard error. L95% CI=lower 95% confidence interval bound. U95% CI=upper 95% confidence interval bound.

\*test of random effect for RC: p=0.039 \*\* technically a sub-hazard-ratio

**Web Table 6: Royston-Parmer model based estimates of the effect of screening at the pre-specified time-points of 5, 10, 15 and 18 years since randomization**

| <b>A: No of deaths avoided (absolute survival difference) per 100 000 women</b> |                     |         |         |                     |         |         |
|---------------------------------------------------------------------------------|---------------------|---------|---------|---------------------|---------|---------|
| Time-point (years)                                                              | MMS vs no screening |         |         | USS vs no screening |         |         |
|                                                                                 | Estimate            | L95% CI | U95% CI | Estimate            | L95% CI | U95% CI |
| 5                                                                               | -0.9                | -28.2   | 26.5    | -3                  | -30.7   | 24.6    |
| 10                                                                              | 6.6                 | -43     | 56.1    | 7.1                 | -42.4   | 56.6    |
| 15                                                                              | 22.8                | -53.1   | 98.8    | 31.6                | -44     | 107.1   |
| 18                                                                              | 36.7                | -65.3   | 138.8   | 52.9                | -48.2   | 153.9   |
| <b>B: Hazard ratio</b>                                                          |                     |         |         |                     |         |         |
| Time-point (years)                                                              | MMS vs no screening |         |         | USS vs no screening |         |         |
|                                                                                 | Estimate            | L95% CI | U95% CI | Estimate            | L95% CI | U95% CI |
| 5                                                                               | 0.98                | 0.82    | 1.18    | 0.98                | 0.82    | 1.17    |
| 10                                                                              | 0.95                | 0.82    | 1.09    | 0.93                | 0.8     | 1.07    |
| 15                                                                              | 0.93                | 0.78    | 1.12    | 0.9                 | 0.75    | 1.08    |
| 18                                                                              | 0.92                | 0.75    | 1.14    | 0.88                | 0.72    | 1.09    |

MMS=multimodal screening. USS=ultrasound screening. CI=Confidence Interval

## C. Supplementary Figures

**Web Figure 1: Cumulative invasive epithelial ovarian and tubal cancer deaths**

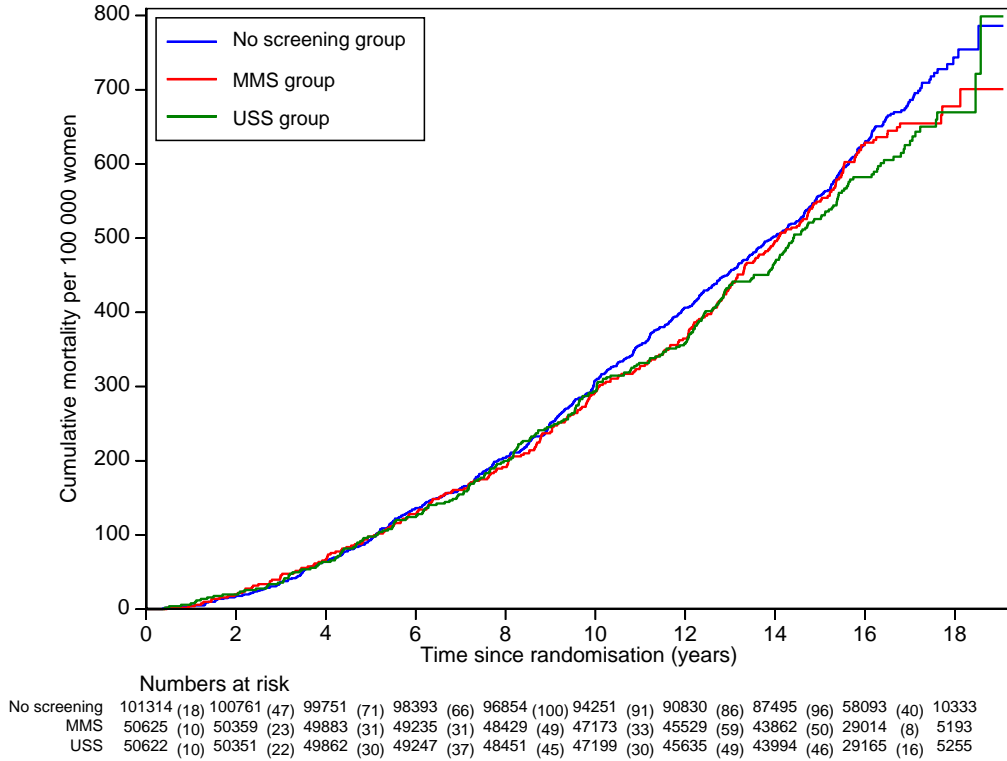

**Web Figure 2a: Cumulative ovarian and tubal cancer deaths by randomisation group with RP model fit overlaid - MMS versus no screening**

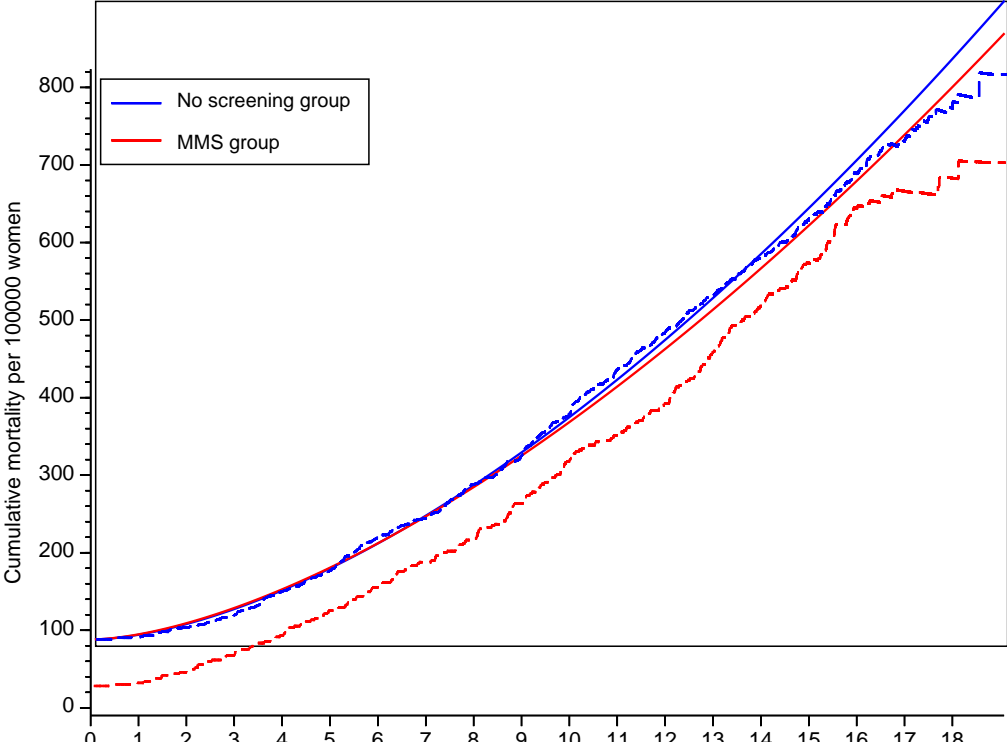

**Web Figure 2b: Cumulative ovarian and tubal cancer deaths by randomisation group with RP model fit overlaid - USS versus no screening**

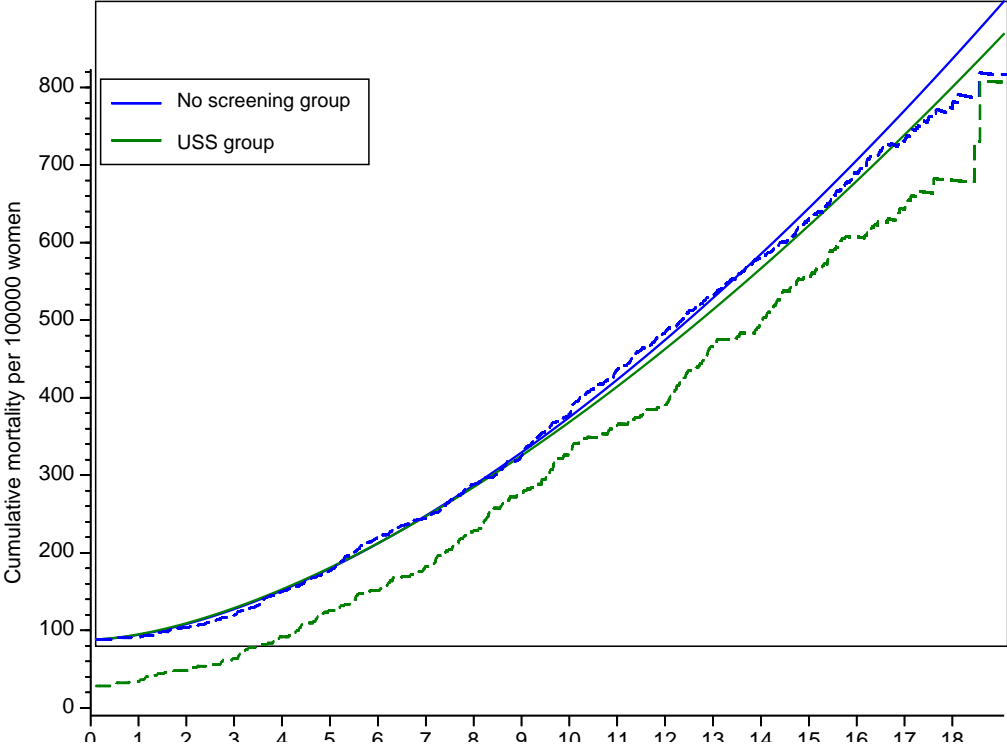

**Web Figure 3a: RP model estimate of ovarian and tubal cancer death rates (hazard function) with 95% confidence limits – MMS versus no screening**

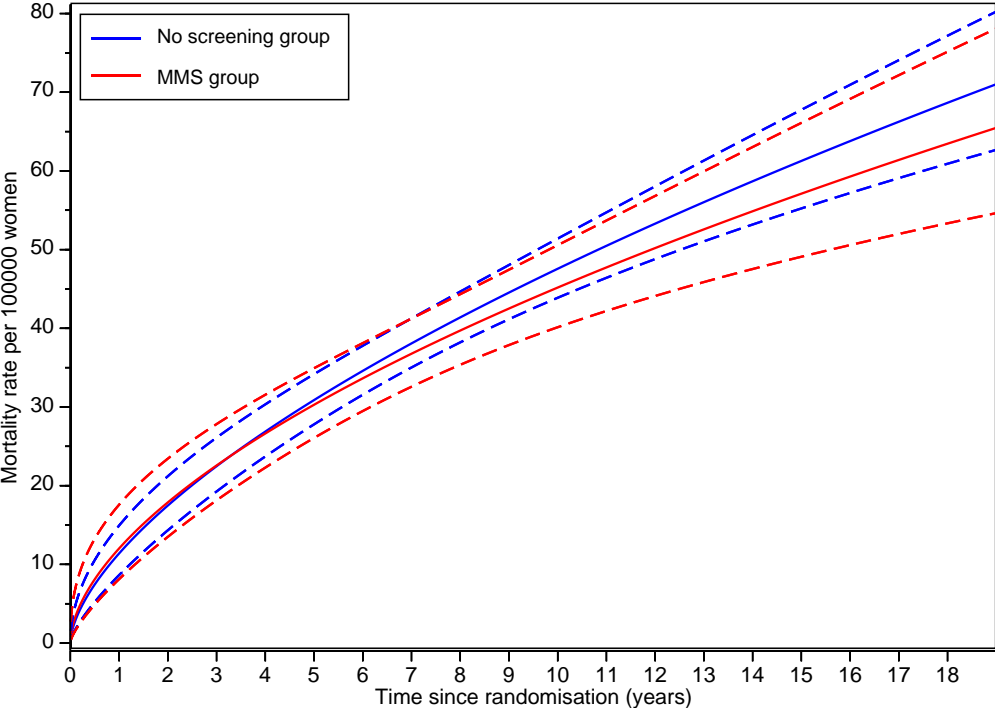

**Web Figure 3b: RP model estimate of ovarian and tubal cancer death rates (hazard function) with 95% confidence limits – USS versus no screening**

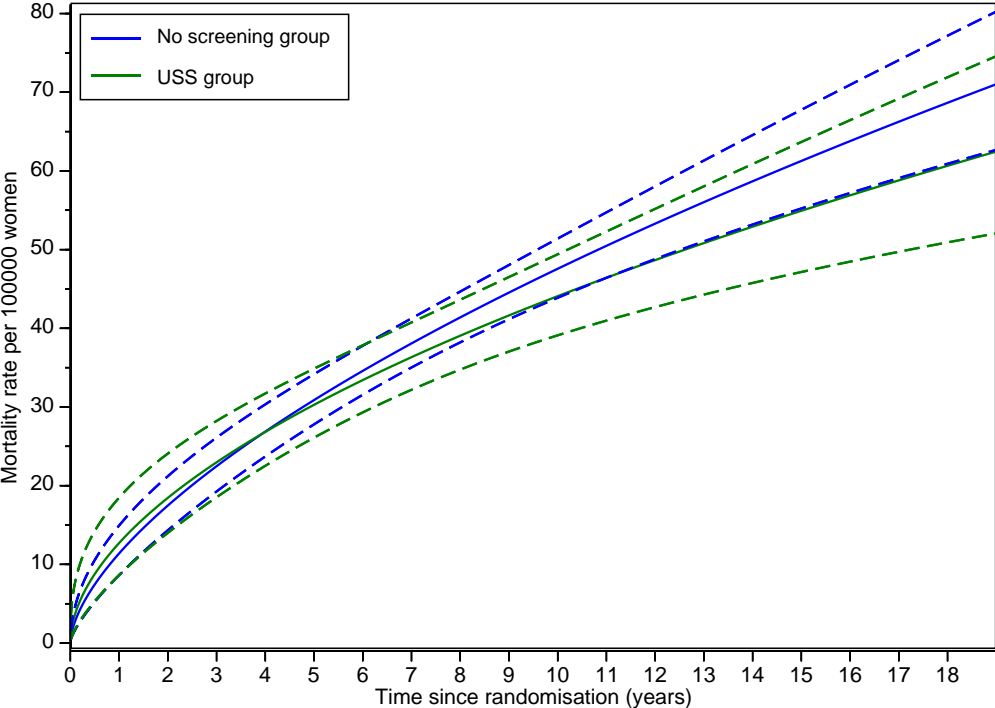



**Web Figure 4a: RP model estimate of ovarian and tubal cancer death hazard ratio for MMS versus no screening with 95% confidence limits**

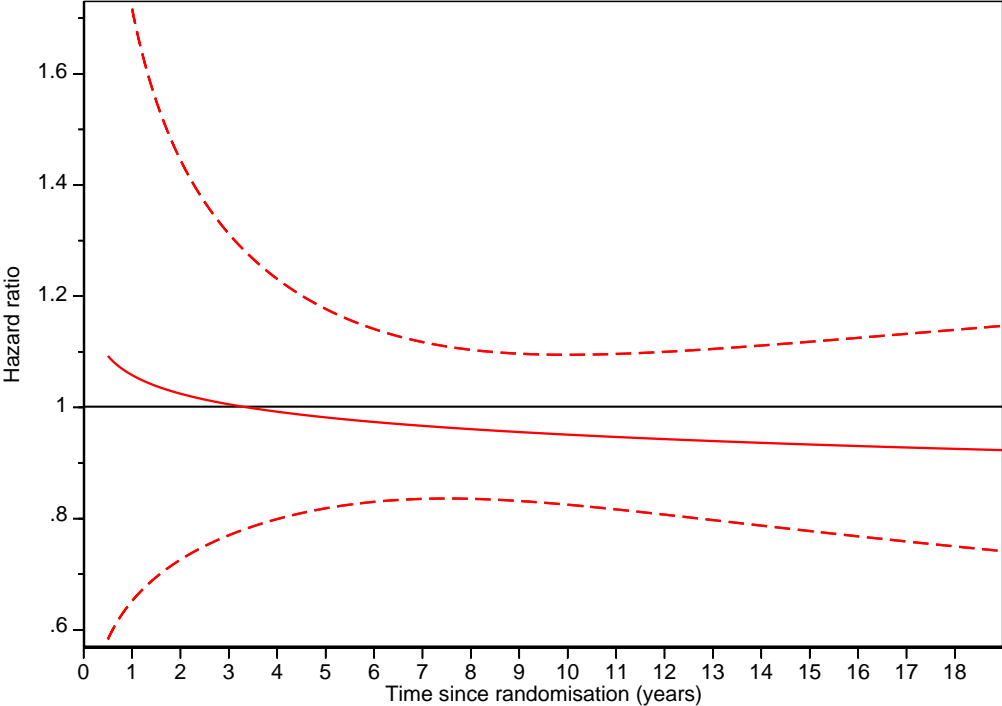

**Web Figure 4b: RP model estimate of ovarian and tubal cancer death hazard ratio for USS versus no screening with 95% confidence limits**

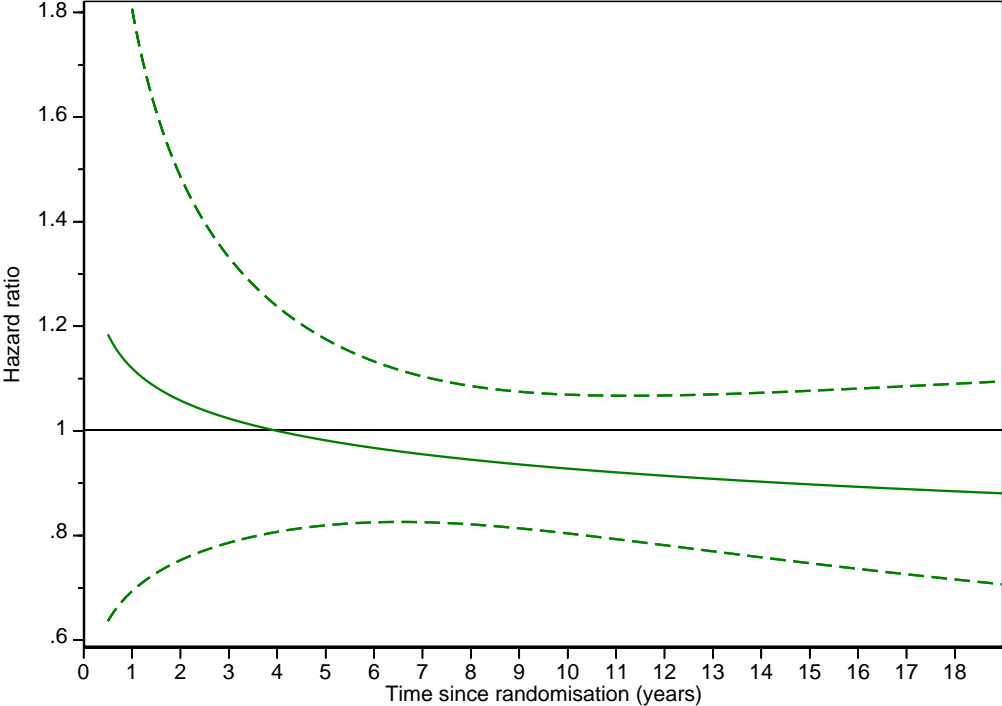

**Web Figure 5: Survival rates in women with ovarian and tubal cancer in the no screening group compared with one-, and five- year age and period adjusted survival rates in the UK population. 10 year survival rates by age group not available for the UK population.**

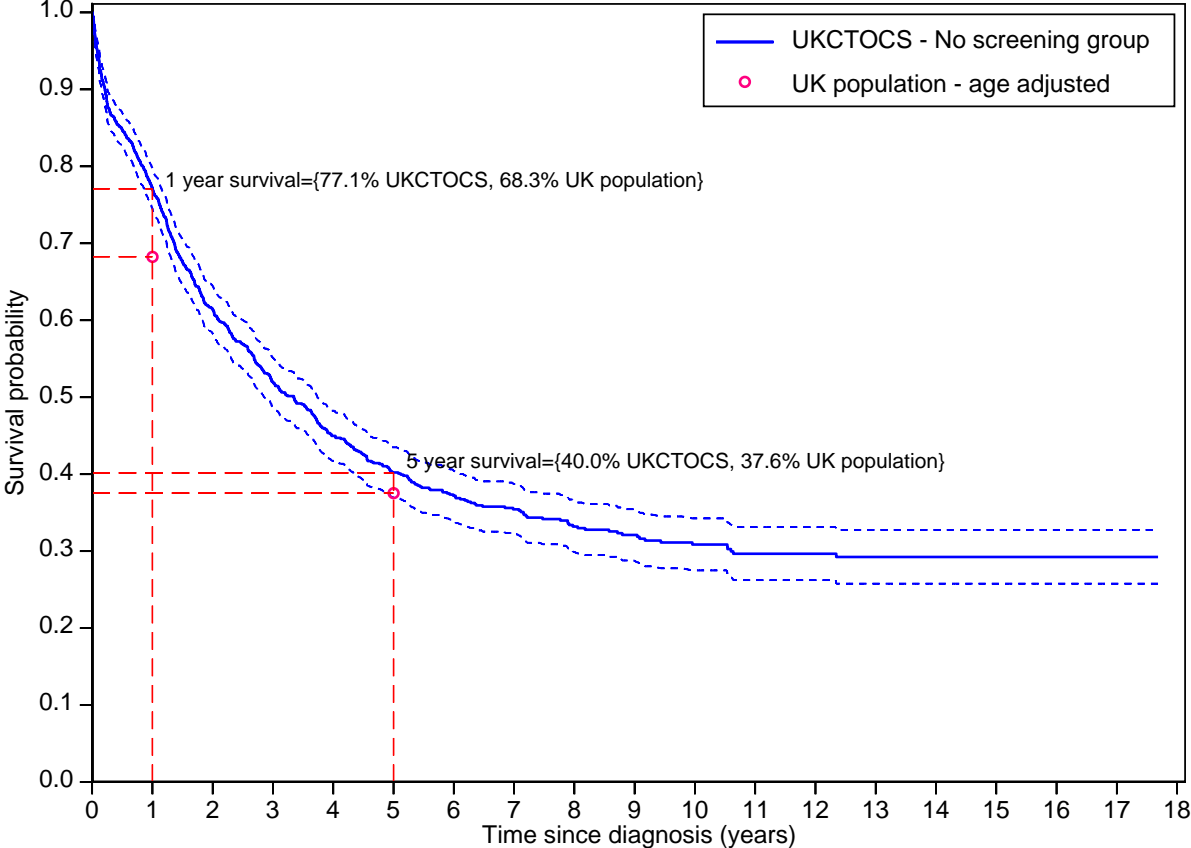

**Web Figure 6a: Cumulative incidence rates (hazard functions) of ovarian and tubal cancer with 95% confidence bands MMS versus no screening**

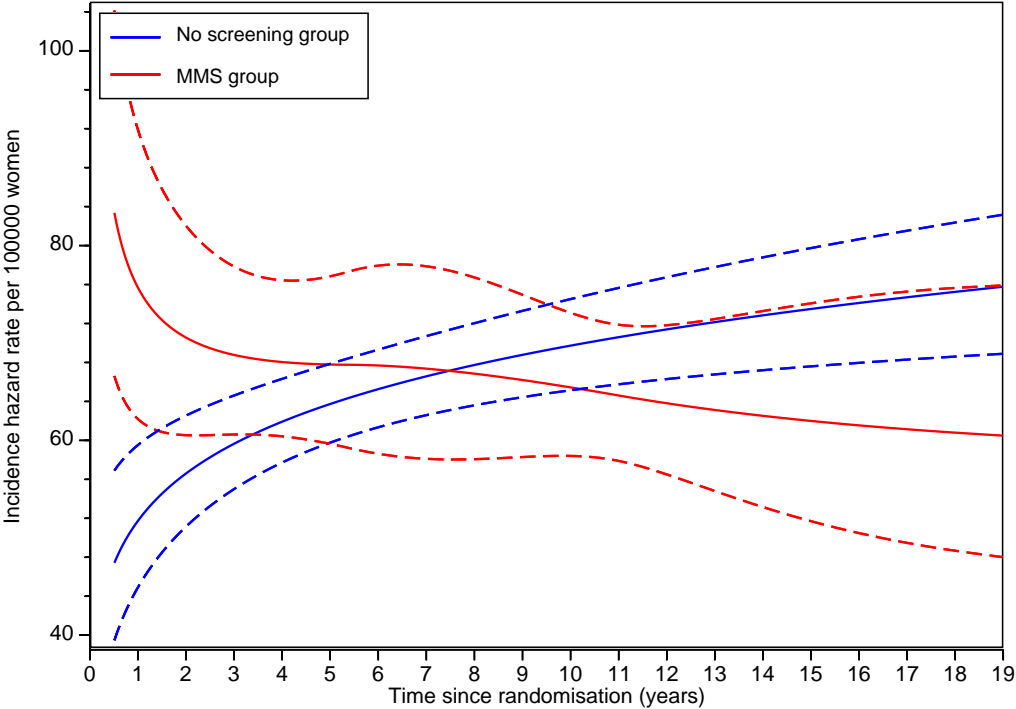

**Web Figure 6b: Cumulative incidence rates (hazard functions) of ovarian and tubal cancer with 95% confidence bands USS versus no screening**

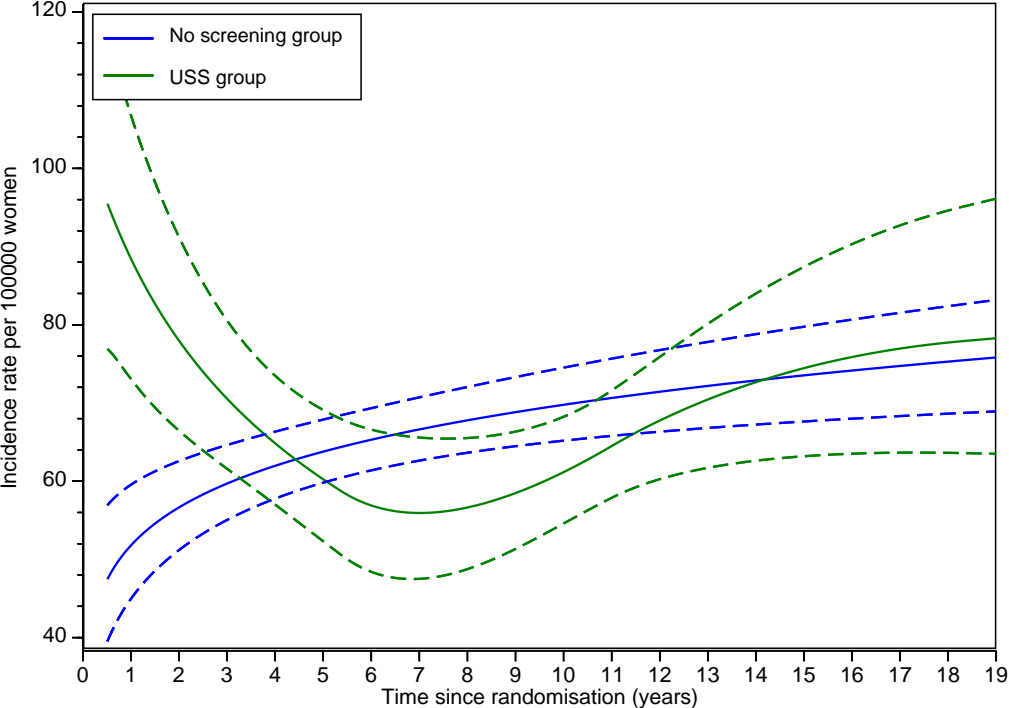

## **D. Long term follow up of UKCTOCS committees and teams**

### **Trial Steering Committee**

Prof H Kitchener (Chair; independent member), Prof Dame J Patnick (independent member), Ms A Jones (independent member & lay representative), Prof J Cuzick (independent member), Prof U Menon, Prof I Jacobs, Prof M Parmar, Prof Dame L Fallowfield.

### **Trial Management Committee**

Core: Prof U Menon (Chair), Prof I Jacobs, Prof M Parmar, Dr S Skates, Prof S Campbell, Prof A McGuire, Prof Dame Lesley Fallowfield, Mr R Woolas, Prof N Singh, Dr A Gentry-Maharaj, Dr A Ryan, Dr M Burnell, Dr J Kalsi.

Extended: Dr A Dawnay, Mr T Mould, Mr MW Seif, Ms A Sharma, Ms K Williamson, Mr S Leeson, Mr S Dobbs

### **Outcome Review Committee**

Prof N Singh (Chair), Mr R Woolas, Prof R Manchandra, Ms K Williamson, Ms A Sharma, Dr R Arora, Dr L Casey.

### **Trial Management Team**

Prof U Menon (Chair), Dr A Gentry-Maharaj (Project Lead), Dr A Ryan, Dr M Burnell, Ms G Carlino, Ms C Karpinskyj, Mrs S Massingham, Ms R Payne, Mrs A Widdup.
